# Supplementary material
Source: MDPI journal article supplement (https://www.mdpi.com/1996-1073/15/18/6790)
Supplement: s1 [file s1]

## Supplementary Materials

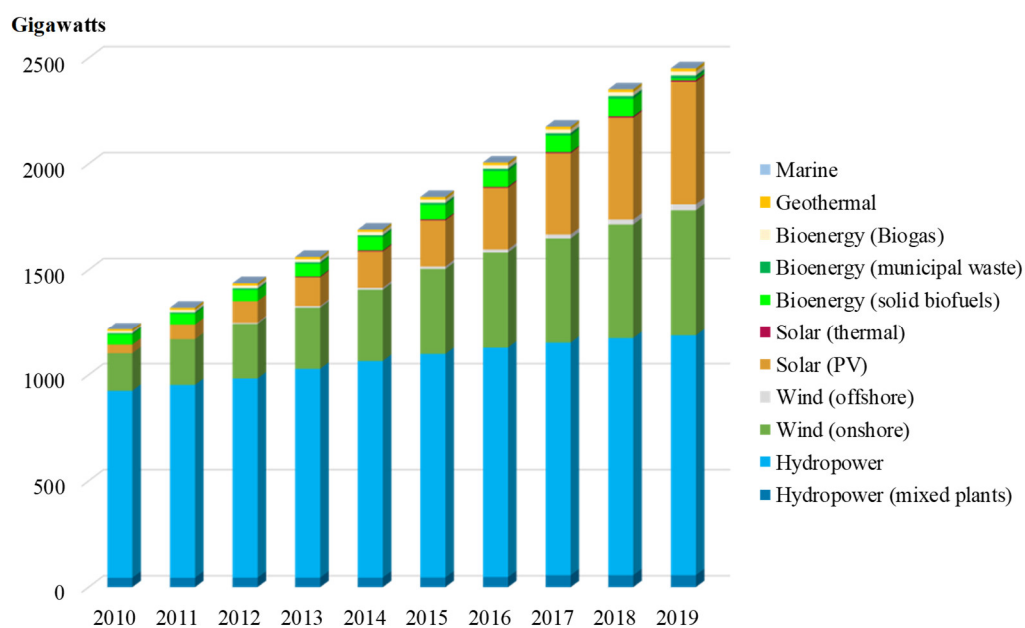

**Figure S1.** Historical global renewable generation capacity by energy (2010–2019) [51].

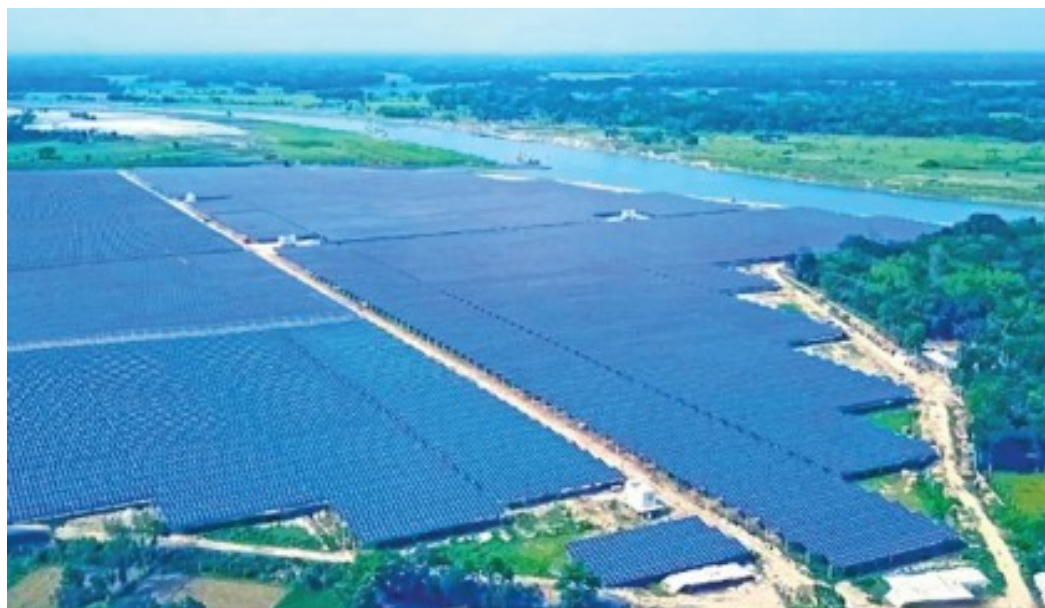

**Figure S2.** Gauripur solar park, Mymensingh, Bangladesh [73].

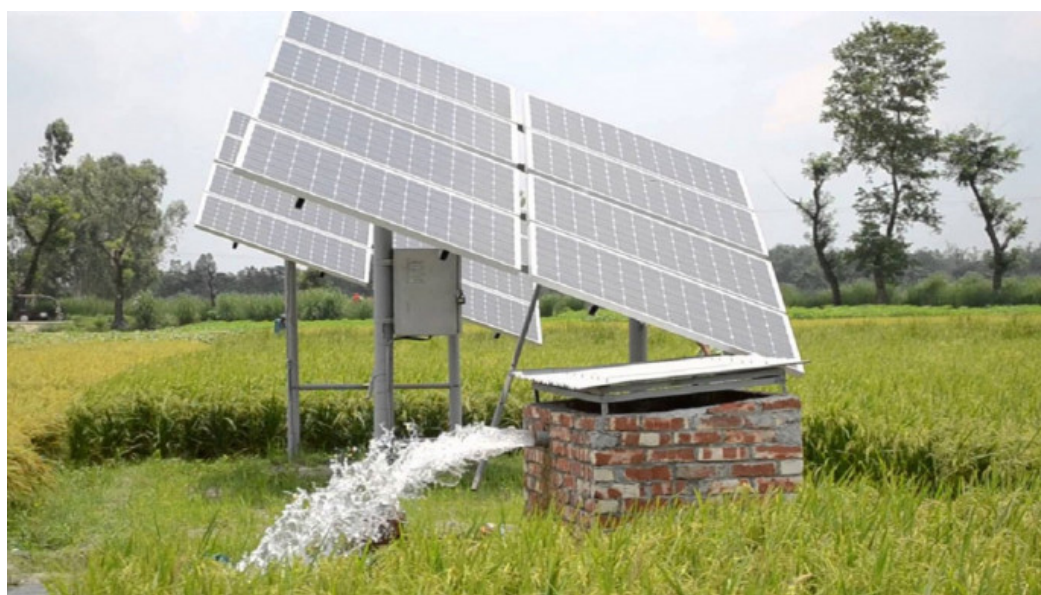

**Figure S3.** Solar irrigation project in Bangladesh [80].

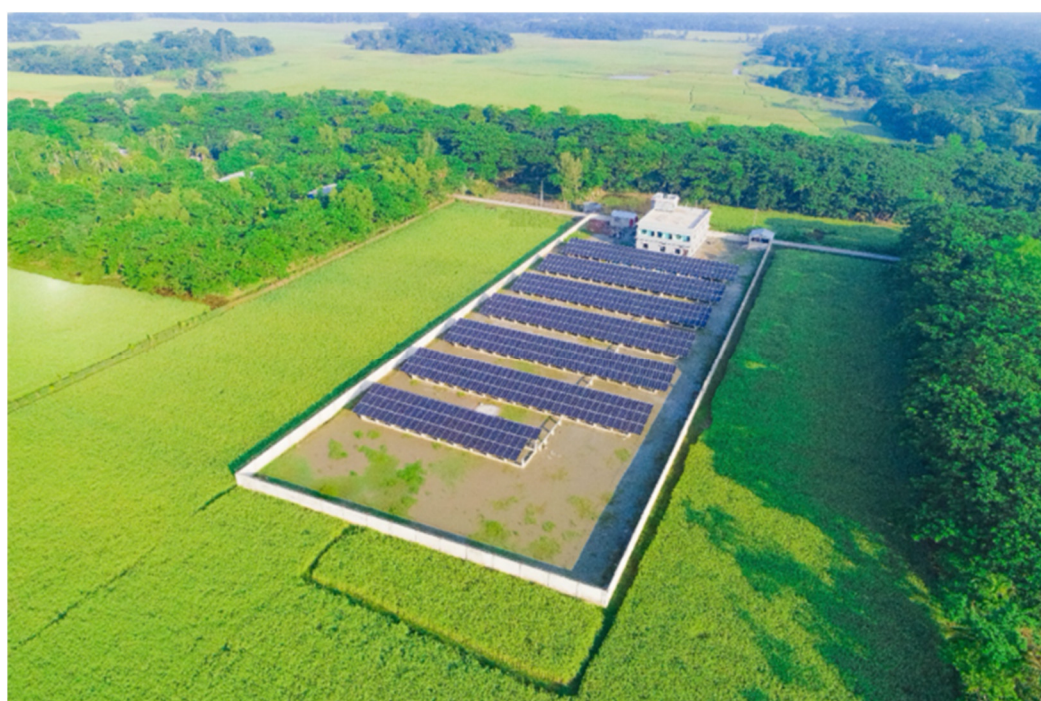

**Figure S4.** Solar mini-grid in Monpura island of Bangladesh [83].
